# Supplementary material for: Expression of Wnt and TGF-Beta Pathway Components during Whole-Body Regeneration from Cell Aggregates in Demosponge Halisarca dujardinii
Source: MDPI journal article supplement (doi:10.3390/genes12060944), 2021-06-20
Supplement: s1 [file s1]

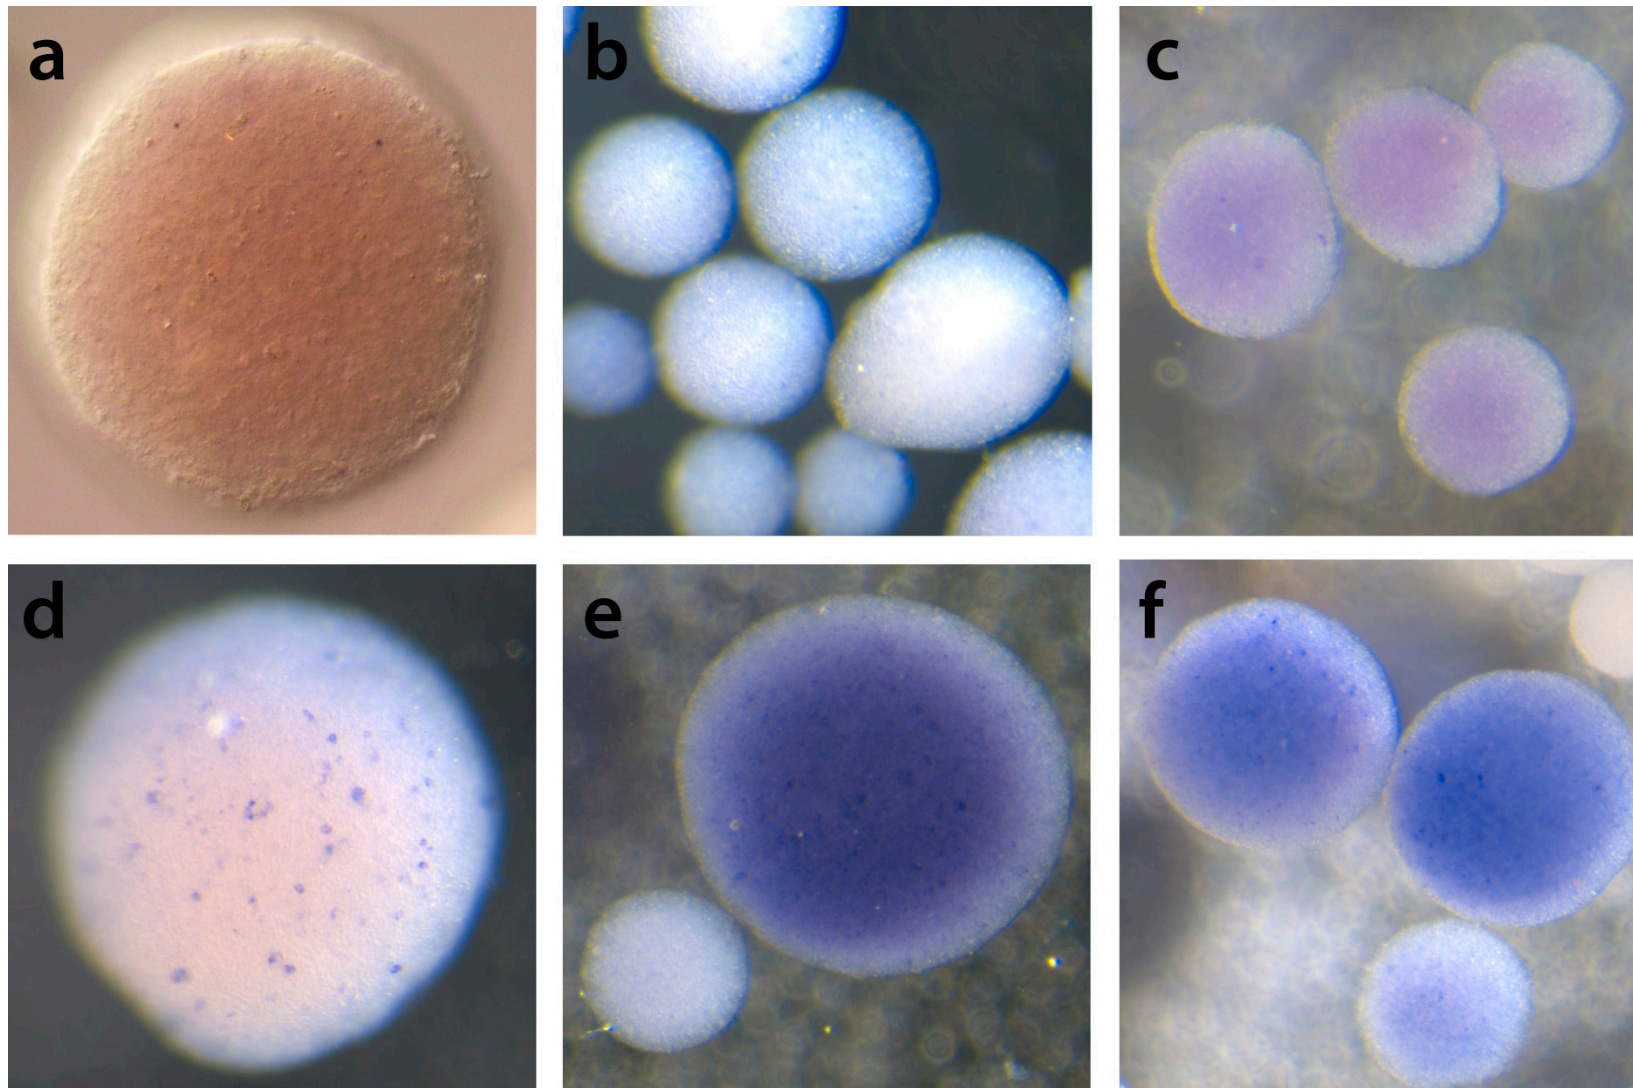

Supplementary File 8. (a-d) negative controls, (e-f) diffuse patterns of expression. Samples were hybridized with sense *HduWntL* (a, b) or sense *HduWntD* (c, e) probe as described in Material and Methods section. Color developed at room temperature overnight (a, b, d) or at 37°C during 24 h. Note artificially stained dark dots at (d) – the algae. (e) antisense probe to *HduWntK*, 1 dpd, and (f) antisense probe to *HduTGFBG*, 3 dpd, demonstrate diffuse staining pattern. Staining development during 5 h at room temperature. Note the little primmorph clear of staining. (a) DIC, (b – f) stereomicroscopy, reflected light.
