# Supplementary material for: Expression of Wnt and TGF-Beta Pathway Components during Whole-Body Regeneration from Cell Aggregates in Demosponge Halisarca dujardinii
Source: MDPI journal article supplement (doi:10.3390/genes12060944), 2021-06-20

Supplementary File 7. (a) 3D model of 1st beta-propeller domain of HduLRP5/6. Yellow arrows correspond to beta sheets, red helix – alpha helix. Six blades of beta propeller, each of four beta sheets, are recognizable. Tertiary structure predicted with RaptorX (<http://raptorx.uchicago.edu/>) according: Xu, J. Distance-based protein folding powered by deep learning. PNAS August 20, 2019, vol. 116 (34), p. 16856-16865. [doi.org/10.1073/pnas.1821309116](https://doi.org/10.1073/pnas.1821309116)

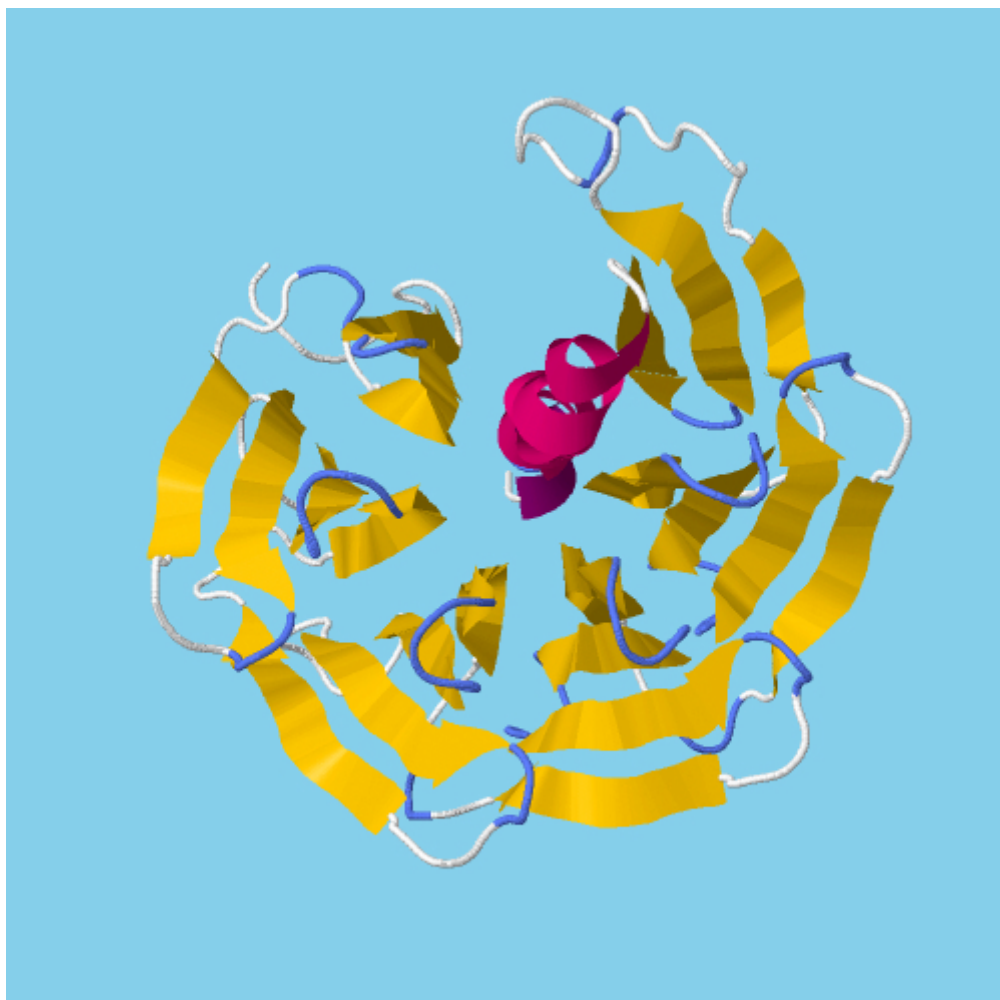

Supplementary File 7. (b) Secondary structure of HduLRP5/6 predicted with JPred4 [26]. Green arrows (jnetpred) indicate beta sheets according consensus prediction, based on alignment and hidden Markov model searching prediction; red coils - helices. Blue ribbons indicate domains recovered by HMMSCAN against Pfam database. The diagram below (JNETCONF) demonstrate the confidence estimate for the prediction

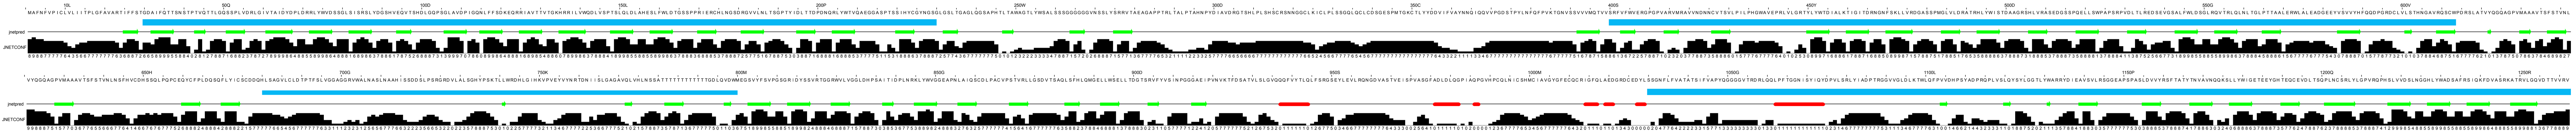

Supplement: s1 [file s1]
