# Supplementary material for: Expression of Wnt and TGF-Beta Pathway Components during Whole-Body Regeneration from Cell Aggregates in Demosponge Halisarca dujardinii
Source: MDPI journal article supplement (doi:10.3390/genes12060944), 2021-06-20
Supplement: s1 [file s1]

Supplementary File 6. List of accession numbers for sequences used in analysis.

|                 |                |
|-----------------|----------------|
| <b>WNT</b>      |                |
| HduWntC         | CUW00361.1     |
| HduWntD         | CUW00360.1     |
| HduWntE         | CUW00365.1     |
| HduWntF         | CUW00358.1     |
| HduWntG         | CUW00357.1     |
| HduWntH         | CUW00359.1     |
| HduWntI         | CUW00356.1     |
| HduWntJ         | CUW00364.1     |
| HduWntK         | CUW00362.1     |
| HduWntL         | CUW00363.1     |
| <b>FRIZZLED</b> |                |
| AquFzdA         | ADO16569.1     |
| AquFzdB         | ADO16570.1     |
| CheFzd1         | ABI98898.1     |
| CheFzd2         | AFI99118.1     |
| CheFzd3         | ABI98899.1     |
| CheFzd4         | AFI99119.1     |
| DmeFzd1         | P18537         |
| DmeFzd2         | Q9V VX3        |
| DmeFzd3         | O77438         |
| DmeFzd4         | Q9NBW1         |
| GdFzd10         | Q9PWH2         |
| GdFzd2          | Q9IA06         |
| GdFzd4          | Q9IA05         |
| GdFzd7          | O57329         |
| GdFzd8          | Q9IA03         |
| GdFzd9          | Q9IA02         |
| MlFzdA          | ADO34161.1     |
| MlFzdB          | ADO34162.1     |
| MmFzd1          | O70421         |
| MmFzd10         | Q8BKG4         |
| MmFzd2          | Q9JIP6         |
| MmFzd3          | Q61086         |
| MmFzd4          | Q61088         |
| MmFzd5          | Q9EQD0         |
| MmFzd6          | Q61089         |
| MmFzd7          | Q61090         |
| MmFzd8          | Q61091         |
| MmFzd9          | Q9R216         |
| NvFzd1          | XP_001647540.1 |
| NvFzd3          | EDO38567.1     |
| NvFzd4          | XP_001622965.2 |
| NvFzd5          | XP_001634995.1 |
| NvFzd9          | XP_032235151.1 |
| SciFzdA         | CDO67909.1     |
| SciFzdB         | CDO67910.1     |
| SciFzdC         | CDO67911.1     |

|                 |                |
|-----------------|----------------|
| SciFzdD         | CDO67912.1     |
| SdoFzd          | Q70LH3         |
| XlFzd1          | Q9I9M5         |
| XlFzd10A        | Q9DEB5         |
| XlFzd10B        | Q9W742         |
| XlFzd2          | Q9PUU6         |
| XlFzd3          | O42579         |
| XlFzd4          | Q9PT62         |
| XlFzd5          | P58421         |
| XlFzd7A         | Q9PUK8         |
| XlFzd7B         | Q8AVJ9         |
| XlFzd8          | O93274         |
| <b>LRP</b>      |                |
| DmeArrow        | Q95V09         |
| LRP CAEEL       | Q04833         |
| LRP1 HUMAN      | Q07954         |
| LRP1 MOUSE      | Q91ZX7         |
| LRP1 RAT        | G3V928         |
| LRP10 HUMAN     | Q7Z4F1         |
| LRP10 MOUSE     | Q7TQH7         |
| LRP11 MOUSE     | Q8CB67         |
| LRP12 HUMAN     | Q9Y561         |
| LRP12 MOUSE     | Q8BUJ9         |
| LRP12 PONAB     | Q5R662         |
| LRP2 HUMAN      | P98164         |
| LRP2 MOUSE      | A2ARV4         |
| LRP2 PIG        | C0HL13         |
| LRP2 RAT        | P98158         |
| LRP3 HUMAN      | O75074         |
| LRP3 RAT        | O88204         |
| LRP4 HUMAN      | O75096         |
| LRP4 MOUSE      | Q8VI56         |
| LRP4 RAT        | Q9QYP1         |
| LRP5 HUMAN      | O75197         |
| LRP5 MOUSE      | Q91VN0         |
| LRP5L HUMAN     | A4QPB2         |
| LRP6 HUMAN      | O75581         |
| LRP6 MOUSE      | O88572         |
| LRP8 CHICK      | Q98931         |
| LRP8 HUMAN      | Q14114         |
| LRP8 MOUSE      | Q924X6         |
| NvLRP5/6        | EDO49133.1     |
| <b>TGF-beta</b> |                |
| Aca nodl        | ACM50754.1     |
| Ame act         | XP_016907093.2 |
| Ame admp        | XP_016767338.2 |
| Ami dpp         | XP_029191188.1 |
| Bfl 80287       | XP_035670031.1 |
| Bfl Bmp24       | AAC97488.1     |
| Bfl Bmp3        | XP_019639535.1 |

|               |                |
|---------------|----------------|
| Bfl Mstn      | XP_035688130.1 |
| Bfl nodr      | AAL99367.1     |
| Bfl Tgf       | XP_035697090.1 |
| Bfl Vgl       | ACF94997.1     |
| Bfl244225     | XP_035699471.1 |
| Bfl99205      | XP_035678629.1 |
| Bgl nod       | XP_013067923.1 |
| Bmi dpp       | NP_001138801.1 |
| Cel cet1      | AAC26791.1     |
| Cgi gdf3      | CAD67715.1     |
| Cin admp      | NP_001071985.1 |
| Cin Tgfb2     | NP_001071838.1 |
| Cs lefty      | BAB68348.1     |
| Dme act       | AAL51005.1     |
| Dre actBb     | CAB43092.1     |
| Dre admp      | NP_571951.2    |
| Dre Bmp10     | NP_001124072.1 |
| Dre Bmp6      | XP_021325833.1 |
| Dre Dvr1      | XP_017207084.1 |
| Dre gdf7      | AAD20829.1     |
| Dre gdnf      | Q98TU0.1       |
| Dre inhBb     | NP_001018166.1 |
| Dre lefty     | AAD34388.1     |
| Dre lefty2    | AJG05927.1     |
| Dre mstn      | AAB86693.1     |
| Dre mstn2     | AAI63304.1     |
| Dre Tgfb1     | NP_878293.1    |
| Dre Tgfb2     | NP_919366.1    |
| Dre Tgfb3     | NP_919367.2    |
| Hm Bmp58      | AID65996.1     |
| Hro nod       | BAC11909.1     |
| Lgi nodal     | ACB42423.1     |
| Mm actBc      | BAE20892.1     |
| Mm bmp10      | AAI45045.1     |
| Mm bmp3       | NP_775580.1    |
| Mm Bmp6       | XP_035311489.1 |
| Mm gdf10      | AAH22669.1     |
| Mm gdf2       | 4MPL A         |
| Mm gdf3       | XP_006505603.1 |
| Mm gdnf       | NP_001288262.1 |
| Mm InhBe      | NP_032408.2    |
| Mm neurt      | NP_032764.1    |
| Mmu artemin   | NP_445849.1    |
| Mmu persephin | O70300.1       |
| Nv act        | ABF61781.1     |
| Nv Bmp24      | AAR13362.1     |
| Nv Bmp58      | ABC88372.1     |
| Nv gdf5       | AAR27581.1     |
| Nv mst        | XP_001641598.2 |
| Nve_1639178   | EDO47115.1     |

|                           |                |
|---------------------------|----------------|
| Pca Bmp58                 | ABA42602.1     |
| Pdu dpp                   | CAJ38807.1     |
| Sja TGFb1                 | ADH10175.1     |
| Sko activin               | NP_001161496.1 |
| Sko admp                  | NP_001158394.1 |
| Sko Bmp24                 | NP_001158387.1 |
| Sko bmp3                  | XP_002735398.1 |
| Sko Bmp58                 | NP_001158388.1 |
| Sko lefty                 | ALR88590.1     |
| Sko nodalA                | ACY92597.1     |
| Sko nodalB                | NP_001161612.1 |
| Sko nodalC                | NP_001164721.1 |
| Sko TGFb2                 | ADB22639.1     |
| Sko univinlike            | ACY92678.1     |
| Spu actB                  | NP_001121540.1 |
| Spu Bmp24                 | ACA04460.1     |
| Spu bmp3                  | XP_030834962.1 |
| Spu Bmp58                 | NP_999820.1    |
| Spu gdf11                 | XP_030846390.1 |
| Spu lefty                 | NP_001123281.1 |
| Spu nod                   | NP_001091919.1 |
| Spu uni                   | XP_030854149.1 |
| Tad 57057                 | XP_002113173.1 |
| Tad 57877                 | XP_002113941.1 |
| Tad 58663                 | XP_002114631.1 |
| Tad 9129                  | XP_002114186.1 |
| Tad 9164                  | XP_002114398.1 |
| Tca actl                  | XP_970355.1    |
| Tca bmp10                 | XP_973577.1    |
| Tca myo                   | XP_966819.1    |
| Tsp Tgh3                  | OUC40670.1     |
| Xl actD                   | NP_001079333.1 |
| Xl Admp1                  | NP_001081792.1 |
| Xl admp2                  | NP_001090587.1 |
| Xl Bmp2                   | NP_001095136.1 |
| Xl Bmp3                   | NP_001082633.1 |
| Xl der                    | NP_001080966.1 |
| Xl Gdf5                   | NP_001086466.1 |
| Xl Gdnf                   | NP_001090196.1 |
| Xl lefty                  | NP_001082043.1 |
| Xl Tgfb2                  | CAA36117.1     |
| Xl Vgl                    | AAW30007.1     |
| Xl Xnr2                   | NP_001081436.1 |
| Xl Xnr6                   | NP_001079033.1 |
| <b>TGF-beta receptors</b> |                |
| Aqu 224888                | XP_003384911.3 |
| Aqu 224889                | XP_003384911.3 |
| Aqu 227937                | XP_019860622.1 |
| Aqu 227949                | XP_011409575.2 |
| Aqu 227950                | XP_003383433.2 |

|              |                |
|--------------|----------------|
| Bfl_124285   | XP_035657497.1 |
| Bfl_213409   | XP_035657408.1 |
| Bfl_221588   | XP_035661292.1 |
| Bfl_79754    | XP_035661061.1 |
| Cin_acvRIb   | NP_001093904.1 |
| Cin_tgfbRIa  | NP_001071834.1 |
| Cin_tgfbRIb  | NP_001071968.1 |
| Cin_TGFbRIIa | NP_001071835.1 |
| Cin_TGFbRIIb | NP_001071836.1 |
| Dme_BaboA    | NP_477000.1    |
| Dme_punt     | NP_001262575.1 |
| Dme_sax      | AAA53242.1     |
| Dme_tkv1     | XP_033172871.1 |
| Dme_wit      | AAL16073.1     |
| Hsa_AcvR1    | XP_028364717.1 |
| Hsa_AcvR2    | XP_016863005.1 |
| Hsa_BMPRI1B  | NP_001243722.1 |
| Hsa_BMPRI2   | XP_011509989.1 |
| Hsa_TGFbR1   | NP_004603.1    |
| Hsa_TGFbR2   | JC5373         |
| MI_TGFbRIa   | AEP16397.1     |
| MI_TGFbRIb   | AEP16398.1     |
| MI_TGFbRIc   | AEP16399.1     |
| MI_TGFbRIIR  | AEP16396.1     |
| Nv_104199    | XP_032238543.1 |
| Nv_140805    | XP_032225445.1 |
| Nv_165860    | XP_001633896.1 |
| Nv_178197    | AFP87425.1     |
| Nv_AcvR2     | AAS77521.1     |
| Sko_BMPRI1   | NP_001158366.1 |
| Spu_AcvRII   | XP_030828527.1 |
| Spu_alk2     | XP_030852853.1 |
| Spu_alk3     | XP_797469.4    |
| Spu_alk5     | XP_798456.4    |
| Spu_BMPRII   | XP_790983.2    |
| Spu_TGFbRII  | XP_030828751.1 |
| Tad_22033    | XP_002110855.1 |
| Tad_22452    | XP_002110322.1 |
| Tad_27560    | XP_002114481.1 |
| Tad_3190     | XP_002116607.1 |
| Tca_babo     | KYB28937.1     |
| Tca_punt     | XP_008198742.1 |
| Tca_sax      | NP_001164080.1 |
| Tca_tkv      | EFA09250.1     |
| Tca_wit      | XP_974821.1    |
| Xla_AcvRIIa  | NP_001084061.1 |
| Xla_BMPRII   | AAI70174.1     |
| <b>SMADs</b> |                |
| Bfl_115184   | XP_035681878.1 |
| Bfl_245341   | XP_035671187.1 |

|             |                |
|-------------|----------------|
| Dme_Mad     | P42003.1       |
| Dme_Medea   | AAC35436.1     |
| Dme_Smad2   | NP_001285006.1 |
| Hro_Smad2_3 | BAB87720.1     |
| Hro_Smad4   | BAB87723.1     |
| Hvu_Smad1   | NP_001296671.1 |
| Mbre_MH2    | XP_001743193.1 |
| Mmu_SMAD4   | P97471.2       |
| Mmu_Smad1   | P70340.2       |
| Mmu_Smad2   | Q62432.2       |
| Mmu_Smad5   | P97454.2       |
| Mmu_Smad7   | O35253.1       |
| Nv_1623482  | EDO31382.1     |
| Nv_1631691  | EDO39628.1     |
| Sko_Smad6   | NP_001158449.1 |
| Tad_Smad1   | XP_002108907.1 |
| Tad_Smad2   | XP_002112850.1 |
| Tad_Smad4   | XP_002116214.1 |
| Tad_Smad6   | XP_002108167.1 |
| Tca_971286  | XP_971286.2    |
| Tca_Smad4   | XP_971429.2    |
| Tca_Smad6   | NP_001139378.1 |
